# Supplementary material for: Which Side Are You On? The Divergent Effects of Protest Participation on Organizations Affiliated with Identity Groups
Source: Atypon-hosted journal article supplement (doi:10.1287/orsc.2019.1302), 2019-07-31
Supplement: orsc.2019.1302.sm1.pdf [file orsc.2019.1302.sm1.pdf]

## APPENDICES A–G

### A. Coding Manual for LGBTQ Protest

The goal of this project is to capture information on all pro-lesbian, gay, bisexual, transgender, queer collective action reported in selected metropolitan newspapers. All protests in favor of any or all of these groups are listed as an event. We are also coding celebration events, such as marches, and anniversary celebrations (such as commemorating the Stonewall Riots).

Researchers were assigned one major city newspaper. Any and all cities in which an event was reported in that metropolitan area should be identified, *even if the particular city or area lies outside the newspaper's or city's boundaries*. So, when coding events in the Los Angeles area, from the Los Angeles Times, if this paper reports a pro-HIV rights march in San Francisco, this event should be coded as a San Francisco event taking place on that date (this means that some events will be covered in multiple papers, which is information we wish to have) with the source newspaper listed as the LA Times. For the 2000-2007 years, click on “cell format” and check on “text” so the 00 will show up for yy in constructing the eventide variable

If any of the information on a variable listed below is completely missing, in the sense that NO information is given on this variable, please put a period (.) in the cell. This means, for example, for the variable “numarrests” = . If the actual number is missing. If the number of arrests cannot be estimated, put a = . for numarrests\_est. If there is a sentence in the report explicitly stating that “no one was arrested” you would put a “0.” There should be no cases where the number of participants or estimated would both be “0.”

Follow-ups are reports about some previous event in which some action was taken and some information allows you to code this as an event relevant to our project. An example would be if the report is about an arrest warrant being issued for a hate crime against gays, or a murder trial for a gay murderer is being reported.

#### Newsbank Coding:

You find “Access World News” published by NewsBank online (see below). Then click on North America, and go to the specific state, and go to the specific newspaper and city you have been assigned.

Or, go to <http://infoweb.newsbank.com/?db=AWNB>

NOTE: the New York Times is no longer on Access World News. To look at the NYT go to:

<http://query.nytimes.com/search/sitesearch/>

And use the search terms below and the year dates.

#### Search Terms:

In the first search box enter:

protest\* OR violen\* OR hate crime OR bash\* OR attack\* OR riot\* OR assault\* OR marriage OR marry

Click on AND –between the two boxes

In the second box, type:

gay\* OR lesbian\* OR homosex\* OR bisex\* OR transsex\* OR transgender\* OR LGBTQ\*

You will be assigned a particular city, year, and one newspaper, beginning with the year 1989-2007.

### Set of Cities and Newspapers

| <b>city</b>      | <b>newspaper</b>             |
|------------------|------------------------------|
| Atlanta GA       | Atlanta Journal-Constitution |
| Baltimore MD     | Baltimore Sun                |
| Boston MA        | Boston Globe                 |
| Chicago IL       | Chicago Tribune              |
| Dallas TX        | Dallas Morning News          |
| Kansas City MO   | Kansas City Star             |
| Los Angeles CA   | Los Angeles Times            |
| Memphis TN       | Commercial Appeal            |
| Miami FL         | Miami Herald                 |
| Minneapolis MN   | Minneapolis Star Tribune     |
| New York NY      | New York Times               |
| San Francisco CA | San Francisco Chronicle      |
| Tucson AZ        | Arizona Star                 |

## B. Coding Instructions for Protest Events

Using the Excel template, fill in every box for the following 45 variables:

| Variable #     | Variable name           | Variable title             | Description                                                                                                                                                                                                                                                                                      | Range and description of values                                                                                                                                                                                                                 |
|----------------|-------------------------|----------------------------|--------------------------------------------------------------------------------------------------------------------------------------------------------------------------------------------------------------------------------------------------------------------------------------------------|-------------------------------------------------------------------------------------------------------------------------------------------------------------------------------------------------------------------------------------------------|
| 1              | Coder First Name        | Coder_name                 | Coder name                                                                                                                                                                                                                                                                                       | character string                                                                                                                                                                                                                                |
| 2              | Newspaper               | Newspaper                  | Newspaper Name                                                                                                                                                                                                                                                                                   | character string                                                                                                                                                                                                                                |
| 3-4-5-6        | grp1-grp4               | Identity of groups present | 1=group present mainly gay males 2=group present mainly gay women, 3=pro-LGBTQ rights protesters not specifically identified by sexual orientation, 4=Some combination of LGBTQ, 5=anti-gay or anti-lesbian or anti LBGT groups, general. 7=anti- LGBTQ religious groups specifically identified | 1 to 6                                                                                                                                                                                                                                          |
| 7              | Rptmm                   | Month of Report            | The publication date of an article is represented by separate variables for month, day, and year. This variable represents the two-digit month of article.                                                                                                                                       | 01 to 12                                                                                                                                                                                                                                        |
| 8              | Rptdd                   | Day of Report              | The publication date of an article is represented by separate variables for month, day, and year. This variable represents the two-digit day of article.                                                                                                                                         | 01 – 31                                                                                                                                                                                                                                         |
| 9              | Rptyy                   | Year of Report             | This variable represents the four-digit year that the article                                                                                                                                                                                                                                    | 1990-2008                                                                                                                                                                                                                                       |
| 9              | Evmm                    | Month of Event             | The date on which an event takes place is represented by separate variables for month, day, and year. This variable represents the two-digit month of an event.                                                                                                                                  | 01 to 12                                                                                                                                                                                                                                        |
| 11             | Evdd                    | Day of Event               | The date on which an event takes place is represented by separate variables for month, day, and year. This variable represents the two-digit month of an event.<br>If no specific day can be identified, code as “00” or leave blank                                                             | 1 – 31                                                                                                                                                                                                                                          |
| 12             | Evy                     | Year of Event              | This variable represents the four-digit year of the event.                                                                                                                                                                                                                                       |                                                                                                                                                                                                                                                 |
| 13             | Eventide                | Event ID                   | Unique identifying number for event<br><br>Leave blank until entire year is coded, then sort (all columns together) by event date, then use the last three digits as a consecutive number.<br><br>Ex. For the first event taking                                                                 | Event ID is set in the form yymmnnn, where yy is the two-digit year, mm is the two-digit month, and nnn is an integer incremented for each event in a given month. For example, 8707001 represents the first event for the month of July, 1987. |
| 14             | Title                   | Article Title              | The full title of the coded article                                                                                                                                                                                                                                                              |                                                                                                                                                                                                                                                 |
| 15             | Page                    | Page                       | The page number on which the article appears                                                                                                                                                                                                                                                     | Integer, 1-n                                                                                                                                                                                                                                    |
| 16             | Section                 | Section                    | The section of the newspaper in which the article appears                                                                                                                                                                                                                                        | Usually an integer, 1-n, but some sections may be alphanumeric (e.g, “A” or “C”).                                                                                                                                                               |
| 17             | est_length              | Estimated length           | An estimate of the number of lines of text devoted to this event                                                                                                                                                                                                                                 | 1-a couple of sentences<br>2=substantial number of paragraphs<br>3=very long article, several columns                                                                                                                                           |
| 18             | state_code              | State(s) Name              | Allow for the recording of up to four states in which the event took place                                                                                                                                                                                                                       | see State Codes 1-5 Appendix A                                                                                                                                                                                                                  |
| 19, 20, 21, 22 | city1-city2-city3-city4 | Central City/ies Name      | Allow for the recording of four cities where simultaneous event occurred.                                                                                                                                                                                                                        | see City Codes Appendix B                                                                                                                                                                                                                       |

|                    |               |                                                                  |                                                                                                                                                                                                                                                                                                                                                                                                       |                                                                                                                                                        |
|--------------------|---------------|------------------------------------------------------------------|-------------------------------------------------------------------------------------------------------------------------------------------------------------------------------------------------------------------------------------------------------------------------------------------------------------------------------------------------------------------------------------------------------|--------------------------------------------------------------------------------------------------------------------------------------------------------|
| 23                 | Neighbor      | Neighborhood/Else Name(s)                                        | The names of neighborhoods or other locations in which an event took place. This is also used to record the name of a college or university when protest took place at an institution.                                                                                                                                                                                                                | Character variable                                                                                                                                     |
| 24                 | Numpartic     | Number of Participants Reported                                  | The number of participants reported as taking part in the event. If participants is estimated, values are assigned according to the following categories: 1 – Small, few handful (1-9 people); 2 – Group, committee (10-49 people); 3 – Large, gathering (50-99 people); 4 – Hundreds, mass, mob (100-999 people); 5 – Thousands (1,000-9,999 people); 6 – Tens of thousands (10,000 or more people). | Integer, 1-N, -99 if not listed                                                                                                                        |
| 25                 | numpartic_est | Dummy Variable flag for when numpartic is estimated.             | If no exact number given, estimates were made.                                                                                                                                                                                                                                                                                                                                                        | 1=handful, small group 1-9, 2=group, committee 1-49, 3=large demonstration, 50+ to 99, 4=hundreds up to 999, 5=thousands, 6=tens of thousands and more |
| 26, 27, 28, 29, 30 | smo1-smo5     | Names of up to 5 Social Movement organizations present at event  | The specific name of each social movement organization labeled Capital Letters in article                                                                                                                                                                                                                                                                                                             | Name of Organization in Report                                                                                                                         |
| 31, 32, 33, 34     | claim1-claim4 | What were the top claims or demand of Protesters (code up to 4)? | Record the most salient reasons for the event or issues that caused protesters to take part.                                                                                                                                                                                                                                                                                                          | See Appendix C Forms for up to 4 Claims codes                                                                                                          |
| 35                 | val1-val4     | Valence of claim                                                 | Each claim has a valence, or orientation of protesters to the issue. Claim1 corresponds to val1, claim2 to val2, and so on.                                                                                                                                                                                                                                                                           | 1 – Protesters favor LGBTQ rights; 2 – Protesters oppose LGBTQ rights; 3 – cannot determine 4- protesters from both sides present (Counter protesters) |
| 36, 37, 38, 39     | form1-form4   | What was the main form of the event?                             | Code the primary shape that the event took; form is the general structure, such as a march or a demonstration, in which more specific <i>activities</i> take place. Form1 is the primary or dominant form.                                                                                                                                                                                            | See Appendix D for up to 4 form codes                                                                                                                  |
| 40                 | Viold         | Did protesters use violence?                                     | Dummy variable representing whether protesters used violence at the event                                                                                                                                                                                                                                                                                                                             | 1 if protesters engaged in violence, 0 otherwise                                                                                                       |
| 41                 | police1       | Police present at event?                                         | Records whether police were reported to be at the event                                                                                                                                                                                                                                                                                                                                               | 1 if police were present, 0 otherwise                                                                                                                  |
| 42                 | police2       | Did police take any kind of action?                              | Police may direct protesters behind barricades, disperse protesters, make arrests, or engage in violence. If they take any action, this value is coded.                                                                                                                                                                                                                                               | 1 if police clearly engaged in any activity beyond simply being present, 0 otherwise                                                                   |
| 43                 | police3       | Did police use any force?                                        | Dummy variable This dummy value represents whether police used any physical tactics during their activity at the event, e.g. pushing forcing crowds to move                                                                                                                                                                                                                                           | 1 if police used any force to control demonstration, 0 otherwise                                                                                       |
| 44                 | police4       | Was violence used by police?                                     | This dummy value represents whether police engaged in any violent tactics such as attacking protesters, or used equipment such as guns, tear gas, nightsticks, or riot control equipment.                                                                                                                                                                                                             | 1 if police used any violent means in the course of their activity at the protest. If police4 is coded as 1, police1 through police3 must be coded 1.  |

|    |               |                                                                                                                                                                             |                                                                                                                                                                                                                                                                                         |                                                                                                                                                                        |
|----|---------------|-----------------------------------------------------------------------------------------------------------------------------------------------------------------------------|-----------------------------------------------------------------------------------------------------------------------------------------------------------------------------------------------------------------------------------------------------------------------------------------|------------------------------------------------------------------------------------------------------------------------------------------------------------------------|
| 45 | Numarrest     | Actual number arrested or . if no number (including the number of "0 arrests) was listed.                                                                                   | Exact number of arrests reported to have been made. If not reported, use numarrest_est (see below)                                                                                                                                                                                      | if code = . If missing or cannot be determined or if estimate is used.<br><br>If report says "no arrests were made" code=0<br>Otherwise, code ACTUAL NUMBER of arrests |
| 45 | numarrest_est | Estimated by key word indicating size of group arrested.<br>Small, few handful =1<br>Group=2<br>Large gathering=3<br>Hundreds=4<br>Thousands, Mass=5<br>Tens of thousands=6 | if an actual number was not reported, 1 – Small, few handful (1-9 people);<br>2 – Group, committee (10-49 people);<br>3 – Large, gathering (50-99 people);<br>4 – Hundreds, mass, mob (100-999 people);<br>5 – Thousands (1,000-9,999 people);<br>6 – Tens of thousands (10,000 or more | If no keywords allow you to estimate how many were arrested or if information on arrests is missing, code as .<br><br>Otherwise, code 0, 1, 2, 3, 4, as listed at left |
| 46 | follow-up     | Report is about a police or legal action taken following some protest or hate crime                                                                                         | 0= not a follow up to previous event<br>1= refers to previous hate crime or protest, e.g. An arrest, a trial, a jury decision about an event involving LGBTQ event                                                                                                                      | 0 or 1                                                                                                                                                                 |

### C. State Codes

| state name     | state abbrev | state ob |
|----------------|--------------|----------|
| Alabama        | AL           | 1        |
| Alaska         | AK           | 2        |
| Arkansas       | AR           | 3        |
| Arizona        | AZ           | 4        |
| California     | CA           | 5        |
| Colorado       | CO           | 6        |
| Connecticut    | CT           | 7        |
| Delaware       | DE           | 8        |
| Florida        | FL           | 9        |
| Georgia        | GA           | 10       |
| Hawaii         | HI           | 11       |
| Iowa           | IA           | 12       |
| Idaho          | ID           | 13       |
| Illinois       | IL           | 14       |
| Indiana        | IN           | 15       |
| Kansas         | KS           | 16       |
| Kentucky       | KY           | 17       |
| Louisiana      | LA           | 18       |
| Massachusetts  | MA           | 19       |
| Maryland       | MD           | 20       |
| Maine          | ME           | 21       |
| Michigan       | MI           | 22       |
| Minnesota      | MN           | 23       |
| Missouri       | MO           | 24       |
| Mississippi    | MS           | 25       |
| Montana        | MT           | 26       |
| North Carolina | NC           | 27       |
| North Dakota   | ND           | 28       |
| Nebraska       | NE           | 29       |
| New Hampshire  | NH           | 30       |
| New Jersey     | NJ           | 31       |
| New Mexico     | NM           | 32       |
| Nevada         | NV           | 33       |
| New York       | NY           | 34       |
| Ohio           | OH           | 35       |
| Oklahoma       | OK           | 36       |
| Oregon         | OR           | 37       |
| Pennsylvania   | PA           | 38       |
| Rhode Island   | RI           | 39       |
| South Carolina | SC           | 40       |
| South Dakota   | SD           | 41       |
| Tennessee      | TN           | 42       |
| Texas          | TX           | 43       |
| Utah           | UT           | 44       |
| Virginia       | VA           | 45       |
| Vermont        | VT           | 46       |
| Washington     | WA           | 47       |
| Wisconsin      | WI           | 48       |
| West Virginia  | WV           | 49       |
| Wyoming        | WY           | 50       |
| Washington DC  | DC           | 51       |

#### D. City Codes

| city_name     | city_code |
|---------------|-----------|
| New York      | 1         |
| San Francisco | 2         |
| Boston        | 3         |
| Los Angeles   | 4         |
| Atlanta       | 5         |
| Dallas        | 6         |
| Miami         | 7         |
| Minneapolis   | 8         |
| Chicago       | 9         |
| Memphis       | 11        |
| Tucson        | 14        |
| Kansas City   | 15        |
| Baltimore     | 17        |

#### E. Claims Codes

| claim                                   | claim_code |
|-----------------------------------------|------------|
| pro-rights, generally expressed         | 100        |
| pro-legal-marriage                      | 101        |
| pro-workplace rights                    | 102        |
| pro-military rights                     | 103        |
| pro-AIDs/HIV victims demonstration      | 104        |
| anti-gay/lesbian general or unspecified | 200        |
| anti-gay/lesb marriage                  | 202        |
| anti workplace rights                   | 203        |
| anti military rights                    | 204        |

#### F. Forms Codes

| event form                                                                        | form code |
|-----------------------------------------------------------------------------------|-----------|
| rally, protest, demonstration, campaign                                           | 1         |
| march to target                                                                   | 2         |
| vigil (e.g. candlelight)                                                          | 3         |
| picketing entrance/outside                                                        | 4         |
| civil disobedience/sit-in                                                         | 5         |
| ceremony: mock funerals, birthdays, gay pride                                     | 6         |
| drama/costumes/performance-based protest                                          | 7         |
| motorcade, parade                                                                 | 8         |
| information distribution: petitions, flyers, teach-ins, public discussion/meeting | 9         |
| symbolic signs:, graffiti, vandalism                                              | 10        |
| attack by instigators of protest against by-standers or building                  | 11        |
| riot, melee, mob violence                                                         | 12        |
| strike, labor union act                                                           | 13        |
| boycott of product or firm                                                        | 14        |
| press conference                                                                  | 15        |
| organizational formation                                                          | 16        |
| attack on gay/lesbian group or people                                             | 17        |
| legal maneuvers lawsuit, referenda, state proposition against gay marriage        | 18        |
| murders, or murder of LGBTQ person                                                | 19        |
| other, not classified elsewhere                                                   | 20        |

**G. Table A1. Classes of Business Organizations in the Gayellow Pages Directory in the Thirteen American Cities**

|                                                       |                                                |                                                |                                             |
|-------------------------------------------------------|------------------------------------------------|------------------------------------------------|---------------------------------------------|
| Accommodation: Hotels, Inns, B&B, Campgrounds         | Credit Repair Services                         | Legal & Mediation Services Attorneys           | Potteries                                   |
| Accommodation: Reservation Services & Exchanges       | Dental Services                                | Lighting                                       | Private Investigators                       |
| Accounting, Bookkeeping, Tax Services                 | Distributors/Wholesalers                       | Liquor & Wine Stores                           | Public Relations/Advertising Agencies       |
| Alterations                                           | Editing/Writing/Proofreading Services          | Mail Order Products                            | Print Publications                          |
| Answering, Mailbox, Shipping, Packaging, Copy Centers | Electronics                                    | Mailing Lists                                  | Publishers/Publishing-Related Services      |
| Antiques & Collectables                               | Employment Services                            | Market Research                                | Quilts                                      |
| Archives, Libraries, Education Projects               | Environmental Consultation                     | Massage                                        | Reading                                     |
| Art & Photography                                     | Erotica (Printed, Visual, Equipment)           | Media Services: Audio, Video, Film, Cd/DVD     | Real Estate                                 |
| Art Galleries/Archives/Restoration, Supplies, Framing | Etcetera                                       | Medical Billing Services                       | Recording Studios                           |
| Astrology/Numerology/Tarot/Psychic Readings           | Exterminators                                  | Meeting/Contact/Dating/Talk lines              | Reproductive/Insemination Services          |
| Auction Services                                      | Financial & Long-term Planning Services        | Messenger Services                             | Research & Genealogy Services               |
| Automobile Services                                   | Flagging                                       | Movie Production                               | Restaurant Equipment/Supplies               |
| Bail Bonds                                            | Florist, Flowers & Plants                      | Movie Theaters                                 | Security Services                           |
| Bakeries                                              | Food Specialties                               | Moving/Transportation/Storage                  | Sign Language Interpreters                  |
| Banks, Credit Unions, Credit Cards                    | Funeral Directors/Cemeteries/Mausoleums        | Music & Records                                | Sport, Self-Defense, Physical Recreation    |
| Bars, Restaurants, Clubs, Discos                      | Furniture                                      | Music Lessons                                  | Sports Equipment & Services                 |
| Bath Supplies                                         | Furniture Stripping                            | Natural Food Stores                            | Stained Glass                               |
| Boating                                               | Gifts & Cards                                  | New Age: Occult, Wicca, Alternative Healing    | Stamps & Coins                              |
| Bookstores: Gay/Lesbian/Feminist                      | Gardening/Landscaping Services & Supplies      | News Wire Services                             | Telecommunications: Phones & Paging Service |
| Bookstores: General                                   | Graphic Design/Typesetting                     | Notary Services                                | Telephone Services                          |
| Broadcast Media                                       | Grooming, Hair Care, Tanning, Spa Services     | Office Supplies                                | Television Sales                            |
| Business Services/Resources                           | Hang Gliders And Waterbeds                     | Ophthalmologists, Optometrists, Opticians      | Thrift/Consignment Stores                   |
| Cabinetmakers                                         | Hardware                                       | Oral Communications                            | Tobacco & Smoke Shops                       |
| Check Printing                                        | Health Clubs, Fitness, Gyms, Men's Clubs       | Party/Event Services/Catering/Weddings         | Toys                                        |
| Child Care                                            | Home & Building: Cleaning; Repair; Contractors | Performing Arts: Entertainment, Music, Theater | Transportation: Limousine, Taxi, Etc.       |
| Cleaning Services                                     | Home Inspection                                | Permanent Hair Removal                         | Travel Services                             |
| Clothes                                               | Hypnotherapy                                   | Personal Care: Grooming & Health               | Vending Machines                            |
| Coffeehouses                                          | Ice Cream Parlors                              | Personal Growth/Fitness Training               | Veterinarians                               |
| Collection Services                                   | Insurance                                      | Pets & Pet Supplies                            | Video Sales, Rentals, Services              |
| Computer & Software Sales & Services                  | Interior Design/Home Furnishings               | Pharmacies/Health Care                         | Websites: Design & Maintenance Services     |
| Conferences/Events/Festivals/Workshops                | Internet Service Providers                     | Philately                                      | Weight Reduction                            |
| Convenience Stores                                    | Jewelry                                        | Piano Tuners                                   | Wineries & Vineyards                        |
| Counseling and Therapy                                | Laundry And Dry Cleaning                       | Piercing & Body Jewelry, Tattoos               | Yoga Classes                                |
